# Supplementary material
Source: Springer Nature journal article supplement (https://www.springermedizin.de/resource/supplementary/12908_2002_7_MOESM1_ESM.pdf/9525212)

■ 4 or more days per week □ 3 days or less per week

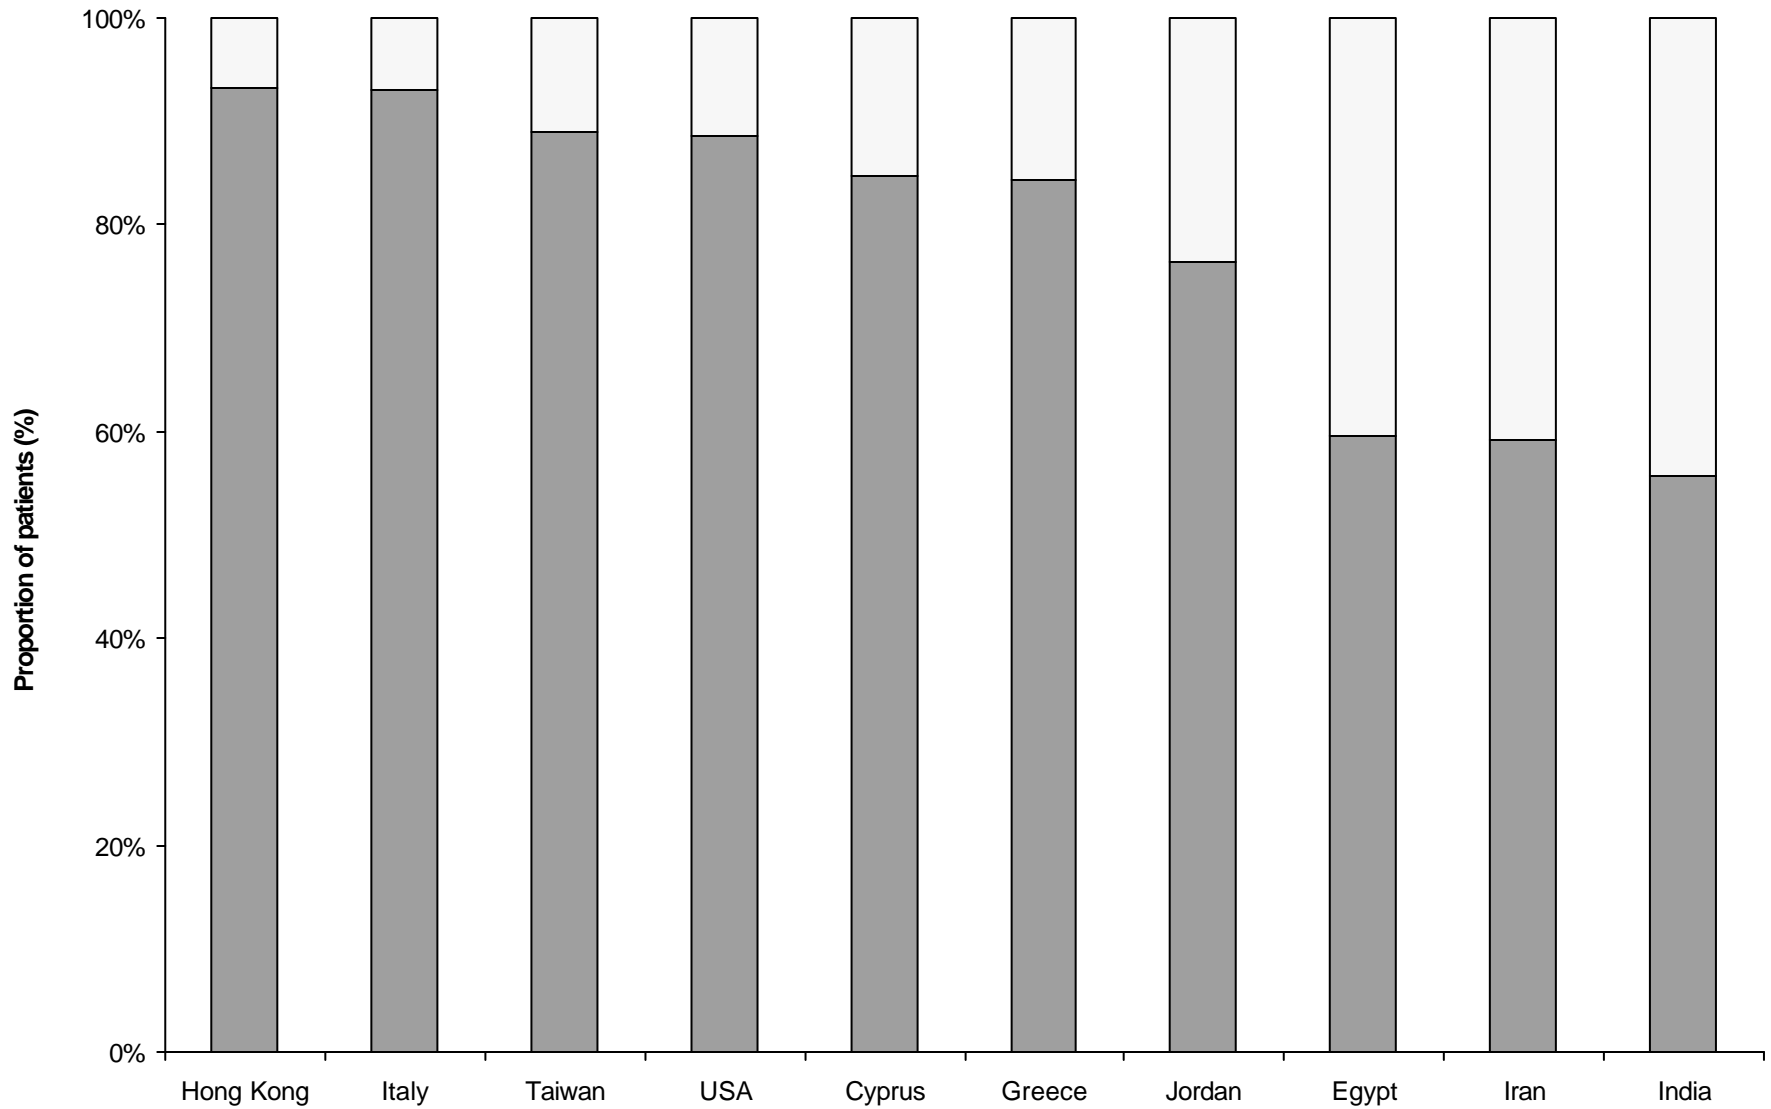

Supplement: MOESM1 [file 9525212]
